# Supplementary material for: Basic features of the predictive tools of early warning systems for water-related natural hazards: examples for shallow landslides
Source: Copernicus journal article supplement (doi:10.5194/nhess-2017-269), 2017-07-26
Supplement: Supplementary file [file nhess-2017-269-AC1-supplement.pdf]

## **Referee #1**

The authors fully appreciate all the remarks raised by the Referee, which will contribute to improve the work in the revised version.

**Referee:** The manuscript describes some models, with examples of their application to three real cases of landslide, which can be adopted in early warning systems (EWS). Particular attention is paid when considering landslides characterized by a rapid evolution. As a whole, although it does not include any novelty, the manuscript is a good contribution to bring order on this filed of study.

**Authors:** *We wish to thank the Referee for his/her positive evaluation of the manuscript and for the useful suggestion given. We just would like to underline here that the general framing of the evolution of an hazardous natural event into three phases, allowing to choose the best option for the implementation of the predictive tool, is - at the best of our knowledge - novel, as somehow noted also by Referee #2.*

**Referee:** The first three paragraphs should, in my opinion, be the subject of a larger synthesis (for example, the manuscript may substantially focus on the specific cases of landslide-related EWS by removing the phrases relating to the avalanche case).

**Authors:** *Although we understand the sake of brevity, on purpose we chose to write the introduction with a general perspective, as the readership of NHESS is not interested only in water-related hazards, and many of the concepts that we apply to rainfall-induced shallow landslides are suitable to (or even derived from) other kinds of natural hazards. We still think that this general perspective adds some value to the paper.*

**Referee:** Some details must be added with reference to the case studies (e.g., the occurrence dates of six Pessinetto debrisflows), to ensure the repeatability of the investigations carried out.

**Authors:** *We thank the Referee for his/her suggestion, and the required details will be added in the revised version of the manuscript.*

**Referee:** GA-SAKe, a more recent and flexible model must be cited/commented. This model does not need to pre-select a transfer function and is based on the same concepts of FLAIr.

**Authors:** *We thank the Referee for advising us of this interesting piece of Literature that we missed. A reference to it will be added in the revised manuscript.*

**Referee:** Some typing errors should be removed and some phrases should be rewritten in a more correct/clear English language.

**Authors:** *A complete check of the entire manuscript will be made to improve the quality and clarity of the language.*

**Referee:** Finally, these and some other minor comments are reported in the attached pdf file.

**Authors:** *We thank the Referee for his/her minor comments about typos, unclear sentences or words, and so on. We will try to fix them all in the revised manuscript.*
